# Supplementary material for: Singlet (1Δg) O2 initiated gas phase oxidation as a potential tropospheric decay channel for ketene
Source: Royal Society of Chemistry journal article supplement (doi:10.1039/d4cp04026k), 2024-12-09
Supplement: d4cp04026k1.zip [file d4cp04026k1.zip]

**Supporting Information**

**for**

**Singlet ( $^1\Delta_g$ ) O<sub>2</sub> initiated gas phase oxidation as  
a potential tropospheric decay channel for ketene**

Saptarshi Sarkar,\* Ashray Dhiman, and Biman Bandyopadhyay\*

*Department of Chemistry, Malaviya National Institute of Technology Jaipur, Jaipur,  
302017, India*

E-mail: saptarshi.sarkar04@gmail.com; biman.chy@mnit.ac.in

In the MESMER program, kinetic calculations are carried out through construction of stochastic energy grained master equation by describing the time dependent rovibrational population density  $[p_m(E)]$  for a particular isomeric species (m) on the PES having total rovibrational energy E. For one dimensional master equation, E is the independent variable. The energy grained master equation keeping E as continuous variable can be expressed by the following differential equation:

$$\begin{aligned} \frac{dp_m(E)}{dt} = & \omega \int_{E_{0m}}^{\infty} P(E|E') p_m(E') dE' - \omega p_m(E) \\ & + \sum_{n \neq m}^M k_{mn}(E) p_n(E) - \sum_{n \neq m}^M k_{nm}(E) p_n(E) - k_{Sm}(E) p_m(E) \\ & + K_{Rm}^{eq} k_{Rm}(E) \frac{\rho_m(E) e^{-\beta E}}{Q_m(\beta)} n_A p_B - k_{Rm}(E) p_m(E) \end{aligned} \quad (1)$$

There are seven terms on right hand side of the above equation. Among them, positive terms correspond to the population flux into the energy grain associated with the chemical species m  $[mE]$  and negative terms correspond to the population flux out of  $[mE]$ . The first term on the right hand side of the above equation represents the population increase in  $[mE]$  through collisional energy transfer.  $\omega$  represents the Lennard-Jones collision frequency and  $P(E|E)$  represents the probability of collision with bath gas (considering  $N_2$  for our investigation). The second term in the above equation corresponds to the population loss from  $[mE]$  due to collision. The reversible population gain for  $p_m(E)$  at a constant energy E through the reaction that transfers population from isomer n to isomer m is described by the third term whereas the fourth term represents the population loss for  $p_m(E)$  at a constant energy E through the reaction that transfers the population from isomer m to isomer n. The  $k_{mn}(E)$  and  $k_{nm}(E)$  terms represent the microcanonical rate coefficient for population transfer from isomer n to isomer m and isomer m to isomer n, respectively. The fifth term corresponds to the irreversible population loss from  $[mE]$  through the reactions that transfer population from isomer m to products S having microcanonical rate coefficient  $k_{Sm}(E)$ . The sixth and seventh terms represent the so called "bimolecular" source term and apply only to those isomers which are populated via bimolecular association reactions. It is based on the assumption that

two bimolecular reactants say A and B are maintained in a Boltzmann distribution and the reactant A is in sufficient large amount compare to reactant B making this condition follow pseudo-first order kinetics. Also, under this condition, the sixth and seventh terms describe the population gain by [mE] due to bimolecular association of reactants A and B (altogether denoted as R) and the population from [mE] via redissociation to the reactants. Here, the  $k_{Rm}(E)$  is the rate coefficient at which [mE] redissociates to give the bimolecular reactants, R, and  $K_{Rm}^{eq}$  represents the equilibrium constant between isomer m and the reactants. The rovibrational partition function for isomer m ( $Q_m(\beta)$ ) is given by  $Q_m(\beta) = \int dE \rho_m(E) e^{-\beta E}$ . In the sixth term,  $n_A$  corresponds to the number density of reactant A and  $p_B$  represents the population in reactant B. The phenomenological rate coefficients are calculated from the eigenvalues and eigenvectors of the system using Bartis-Widom method. Inverse Laplace transform (ILT) method has used to obtain microcanonical rate coefficients from an existing Arrhenius form. Generally, the required Arrhenius parameters for the ILT method in MESMER are usually obtained from experimental data through the fitting process. But there exist no experimental studies on the kinetics of the reaction of Ketene and  $^1\text{O}_2$ . So, we have calculated the rate coefficient of the bimolecular barrierless association step using KTOOLS from Multiwell at different temperatures. Molecular geometry optimization and normal mode vibrational frequency calculations of reactant and trial transition state along the unimolecular dissociation reaction path have been carried out at M06-2X/aug-cc-pVTZ level of theory. Further, the energetics of the unimolecular dissociation reaction path have been extrapolated up to reported all the corrected energy limits using a two point fitting method. By fitting these rate coefficient values, we have calculated the Arrhenius bimolecular association parameter for the studied reaction. Under the high pressure condition, the equilibrium constant for  $(A + B \xrightleftharpoons[k_b]{k_a} C)$  can be expressed as:

$$K = \frac{k'_a}{k_d} = \frac{\chi_C}{\chi_B} \quad (2)$$

where forward rate coefficient  $k'_a = k_a A$ .  $\chi_C$  and  $\chi_B$  are the equilibrium fraction of C

and B, respectively. The canonical high pressure rate coefficient may be expressed as:

$$k_d(\beta) = K_e(\beta)k_a(\beta) \quad (3)$$

In case of  $k_a(\beta)$  having a modified Arrhenius expression, the equation becomes:

$$\frac{W(E)}{h} = k(E)\rho(E) = A_0\beta_0^n L^{-1}[K_e(\beta)\frac{Q(\beta)}{\beta^n}e^{-\beta E_a}] \quad (4)$$

The final result obtained is:

$$k(E)\rho(E) = \frac{A_0\beta_0^n}{\Gamma(n+1.5)}\left(\frac{2\pi\mu}{h^2}\right)^{\frac{3}{2}}\left(\frac{g_A g_B}{g_C}\right) \int_0^E d\tau \rho_R(E-\tau)(\tau - E_a - \Delta H_0^0)^{n+0.5} u(\tau - E_a - \Delta H_0^0) \quad (5)$$

where  $\rho_R E$  is the convolved density of states for the associating pair,  $\Delta H_0^0$  is the enthalpy of reaction,  $\mu$  is the reduced mass of the system and  $g_X$  is the spin degeneracy of species X.

Table S1: T1-diagnostic values of all the studied species calculated at CCSD(T)/aug-cc-pVTZ//CCSD(T)-F12/cc-pVDZ-F12 level

| Species                         | T1-Diagnostic |
|---------------------------------|---------------|
| H <sub>2</sub> C <sub>2</sub> O | 0.016516      |
| <sup>1</sup> O <sub>2</sub>     | 0.015602      |
| RC                              | 0.017854      |
| TS                              | 0.045512      |
| PC                              | 0.017264      |
| CH <sub>2</sub> O               | 0.015650      |
| CO <sub>2</sub>                 | 0.017947      |

Table S2: Concentrations of <sup>1</sup>O<sub>2</sub> (molecules cm<sup>-3</sup>) at different altitudes in troposphere

| Altitude<br>(km) | T<br>(K) | P<br>(atm) | <sup>1</sup> O <sub>2</sub> |
|------------------|----------|------------|-----------------------------|
| 0                | 298      | 1          | $1.7 \times 10^8$           |
| 5                | 259      | 0.535      | $1.0 \times 10^8$           |
| 10               | 230      | 0.266      | $5.8 \times 10^7$           |
| 15               | 213      | 0.120      | $2.8 \times 10^7$           |

Table S3: Absolute electronic energies, ZPE corrections and thermal corrections to Gibbs Free energies at 298K of all the studied species calculated at CCSD(T)/CBS//CCSD(T)-F12/cc-pVDZ-F12 level (All values are in Hartrees)

| Species                         | CCSD(T)-F12/<br>cc-pVDZ-F12 | CCSD(T)/<br>CBS | ZPE<br>Correction | Thermal Correction<br>to Gibbs Free Energy |
|---------------------------------|-----------------------------|-----------------|-------------------|--------------------------------------------|
| H <sub>2</sub> C <sub>2</sub> O | -152.394060                 | -152.431767     | 0.031426          | 0.007801                                   |
| <sup>1</sup> O <sub>2</sub>     | -150.118161                 | -150.155250     | 0.003420          | -0.015530                                  |
| RC                              | -302.612299                 | -302.689841     | 0.043314          | 0.016324                                   |
| TS                              | -302.576611                 | -302.652545     | 0.039176          | 0.011930                                   |
| PC                              | -302.739704                 | -302.815794     | 0.039574          | 0.008785                                   |
| CH <sub>2</sub> O               | -188.373463                 | -188.420100     | 0.026667          | 0.005007                                   |
| CO <sub>2</sub>                 | -114.361450                 | -114.390795     | 0.010070          | -0.010588                                  |

Table S4: Contribution of core electron and full triple excitations along with perturbative quartic excitations of all the studied species calculated at all-electron CCSD(T)/aug-cc-pCVTZ and CCSDT(Q)/cc-pVDZ levels of theory respectively (All values are in Hartrees)

| Species                             | E <sub>CORE</sub> | E <sub>T(Q)</sub> |
|-------------------------------------|-------------------|-------------------|
| H <sub>2</sub> C <sub>2</sub> O     | -0.159284         | -0.002303         |
| <sup>1</sup> O <sub>2</sub>         | -0.114012         | -0.012856         |
| RC                                  | -0.273036         | -0.004161         |
| TS                                  | -0.272515         | -0.008297         |
| PC                                  | -0.273785         | -0.003773         |
| CH <sub>2</sub> O + CO <sub>2</sub> | -0.273841         | -0.003842         |

Table S5: Absolute electronic energies and ZPE corrections at 298K of all the studied species calculated at M06-2X/aug-cc-pVTZ level of theory (All values are in Hartrees)

| Species                         | E <sub>M06-2X/AUG-CC-PVTZ</sub> | ZPE<br>Correction |
|---------------------------------|---------------------------------|-------------------|
| H <sub>2</sub> C <sub>2</sub> O | -152.598693                     | 0.031916          |
| <sup>1</sup> O <sub>2</sub>     | -150.265705                     | 0.003986          |
| TS <sup>1</sup>                 | -302.862518                     | 0.039604          |
| RC                              | -302.973247                     | 0.044287          |
| TS <sup>2</sup>                 | -302.907606                     | 0.040058          |
| PC                              | -303.098737                     | 0.040525          |

Table S6: Optimized geometries of all the species in Cartesian Coordinates and normal mode frequencies calculated at CCSD(T)-F12/cc-pVDZ-F12 level

| Species                     | Cartesian Coordinates(Å)        | Frequencies( $\text{cm}^{-1}$ ) |
|-----------------------------|---------------------------------|---------------------------------|
| CH <sub>2</sub> CO          | C 0.000218 -1.213823 -0.000000  |                                 |
|                             | H -0.941969 -1.736735 0.000000  | 438.64 511.61 584.74            |
|                             | H 0.9425914 -1.736399 0.000000  | 993.20 1153.78 1415.68          |
|                             | C -0.000015 0.102624 -0.000000  | 2195.26 3196.02 3305.43         |
|                             | O -0.000227 1.265446 0.000000   |                                 |
| <sup>1</sup> O <sub>2</sub> | O 0.000000 0.000000 0.609918    |                                 |
|                             | O 0.000000 0.000000 -0.609918   | 1501.35                         |
| RC                          | C -0.600348 0.973487 0.000235   |                                 |
|                             | H -0.727823 1.567643 -0.903489  | 221.94 484.45 506.35            |
|                             | H -0.727715 1.567192 0.904272   | 736.63 819.74 917.58            |
|                             | C 0.602414 0.062691 -0.000086   | 1020.89 1024.71 1146.46         |
|                             | O 1.785085 0.108656 -0.000051   | 1153.96 1309.59 1487.84         |
|                             | O -0.191863 -1.064871 -0.000152 | 1941.44 3085.68 3155.69         |
|                             | O -1.425043 -0.212257 -0.000006 |                                 |
| TS                          | C -0.743828 -0.867698 0.000309  |                                 |
|                             | H -0.808884 -1.465843 0.912245  | 742.40i 195.12 450.77           |
|                             | H -0.805574 -1.475273 -0.905318 | 539.34 591.33 729.55            |
|                             | C 0.537645 -0.019178 -0.000835  | 934.62 962.34 1040.82           |
|                             | O 1.686872 -0.408044 -0.012201  | 1200.81 1285.45 1491.24         |
|                             | O 0.264812 1.236559 0.011329    | 1633.05 3015.12 3126.98         |
|                             | O -1.630666 0.206762 -0.005549  |                                 |
| PC                          | C -2.133239 0.169285 0.000000   |                                 |
|                             | H -1.776872 1.211567 0.000112   | 41.58 85.71 106.49              |
|                             | H -3.223531 0.011126 0.000025   | 149.79 159.13 662.65            |
|                             | C 1.316957 0.167193 -0.000009   | 678.73 1195.10 1275.73          |
|                             | O 1.789886 -0.892738 0.000073   | 1352.07 1534.26 1772.59         |
|                             | O 0.875573 1.245089 0.000003    | 2392.32 2942.87 3022.18         |
|                             | O -1.361682 -0.760871 -0.000139 |                                 |
| CH <sub>2</sub> O           | C -0.531570 0.000033 0.000008   |                                 |
|                             | O 0.675038 -0.000072 -0.000003  | 1186.47 1271.50 1536.92         |
|                             | H -1.111283 0.937962 0.000013   | 1778.81 2930.21 3001.76         |
|                             | H -1.111436 -0.937801 0.000013  |                                 |
| CO <sub>2</sub>             | C 1.263257 0.164127 0.000018    |                                 |
|                             | O 1.728233 -0.901455 0.000017   | 675.48 1352.36 2392.29          |
|                             | O 0.798281 1.229709 0.000019    |                                 |

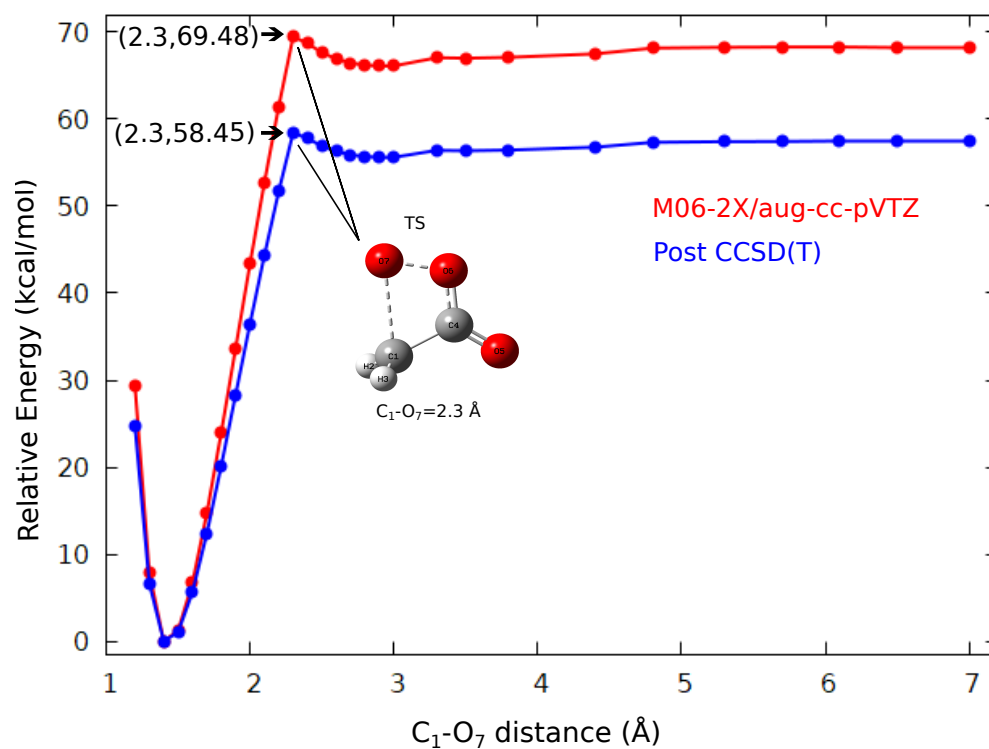

Figure S1: Relaxed potential energy scan profile for the bimolecular addition step at M06-2X/aug-cc-pVTZ level and the projected scan profile considering energy values after Post-CCSD(T) corrections



Listing 1: KTOOLS input file for  $\text{H}_2\text{C}_2\text{O} + {}^1\text{O}_2$

```

1 C2H2O-O2
2 KCAL MCC ! Ekey, Sskey
3 nosavefiles ! Whatdo
4 40000 10. ! Emax Egrain
5 500 1 ! Jmax Jgrain
6 301 902 40000. ! 1D double array parameters: Imax1, Isize, Emax2
7 15 ! Nt number of temperatures
8 200. 210. 220. 230. 240. 250. 260. 270. 280. 290. 298. 300. 310. 320. 330.
9 1 32 2 ! no. of reactants, no. of of trial transition states, no.
    of products
10
11 reac rc -57.45 1.4
12 C2H2O3
13 a) (blank comment line)
14 b) (blank comment line)
15 c) (blank comment line)
16 1 1 1
17 0.0 1
18 17 'HAR' AMUA
19 1 vib 233.9246 0.0 1
20 2 vib 496.6897 0.0 1
21 3 vib 507.0428 0.0 1
22 4 vib 766.1007 0.0 1
23 5 vib 944.4380 0.0 1
24 6 vib 994.7600 0.0 1
25 7 vib 1020.6032 0.0 1
26 8 vib 1061.0997 0.0 1
27 9 vib 1154.6336 0.0 1
28 10 vib 1178.2013 0.0 1
29 11 vib 1317.7260 0.0 1
30 12 vib 1483.5546 0.0 1
31 13 vib 2001.3337 0.0 1
32 14 vib 3107.3201 0.0 1
33 15 vib 3172.4158 0.0 1
34 16 kro 36.1475 1.0 1 ! K-rotor
35 17 jro 109.3677 1.0 2 ! 2D adiabatic rotor
36
37 ctst rc-150 -56.42 1.5 0.0
38 C2H2O3
39 a) (blank comment line)
40 b) (blank comment line)
41 c) (blank comment line)
42 1 1 1

```

|    |        |                      |           |     |     |                      |
|----|--------|----------------------|-----------|-----|-----|----------------------|
| 43 | 0.0    |                      | 1         |     |     |                      |
| 44 | 17     | 'HAR'                | AMUA      |     |     |                      |
| 45 | 1      | vib                  | 257.3995  | 0.0 | 1   |                      |
| 46 | 2      | vib                  | 506.1280  | 0.0 | 1   |                      |
| 47 | 3      | vib                  | 516.8213  | 0.0 | 1   |                      |
| 48 | 4      | vib                  | 756.6622  | 0.0 | 1   |                      |
| 49 | 5      | vib                  | 860.5564  | 0.0 | 1   |                      |
| 50 | 6      | vib                  | 979.3644  | 0.0 | 1   |                      |
| 51 | 7      | vib                  | 997.2725  | 0.0 | 1   |                      |
| 52 | 8      | vib                  | 1013.0451 | 0.0 | 1   |                      |
| 53 | 9      | vib                  | 1117.5384 | 0.0 | 1   |                      |
| 54 | 10     | vib                  | 1185.6223 | 0.0 | 1   |                      |
| 55 | 11     | vib                  | 1299.2602 | 0.0 | 1   |                      |
| 56 | 12     | vib                  | 1466.7381 | 0.0 | 1   |                      |
| 57 | 13     | vib                  | 1993.1187 | 0.0 | 1   |                      |
| 58 | 14     | vib                  | 3124.7119 | 0.0 | 1   |                      |
| 59 | 15     | vib                  | 3202.5328 | 0.0 | 1   |                      |
| 60 | 16     | kro                  | 36.9869   | 1.0 | 1   | ! K-rotor            |
| 61 | 17     | jro                  | 109.9797  | 1.0 | 2   | ! 2D adiabatic rotor |
| 62 |        |                      |           |     |     |                      |
| 63 | ctst   | rc-160               | -51.82    | 1.6 | 0.0 |                      |
| 64 | C2H2O3 |                      |           |     |     |                      |
| 65 | a)     | (blank comment line) |           |     |     |                      |
| 66 | b)     | (blank comment line) |           |     |     |                      |
| 67 | c)     | (blank comment line) |           |     |     |                      |
| 68 | 1      | 1                    | 1         |     |     |                      |
| 69 | 0.0    |                      | 1         |     |     |                      |
| 70 | 17     | 'HAR'                | AMUA      |     |     |                      |
| 71 | 1      | vib                  | 268.3791  | 0.0 | 1   |                      |
| 72 | 2      | vib                  | 513.6877  | 0.0 | 1   |                      |
| 73 | 3      | vib                  | 525.4037  | 0.0 | 1   |                      |
| 74 | 4      | vib                  | 629.0777  | 0.0 | 1   |                      |
| 75 | 5      | vib                  | 757.5638  | 0.0 | 1   |                      |
| 76 | 6      | vib                  | 960.8159  | 0.0 | 1   |                      |
| 77 | 7      | vib                  | 979.7570  | 0.0 | 1   |                      |
| 78 | 8      | vib                  | 1001.3211 | 0.0 | 1   |                      |
| 79 | 9      | vib                  | 1073.1534 | 0.0 | 1   |                      |
| 80 | 10     | vib                  | 1185.8990 | 0.0 | 1   |                      |
| 81 | 11     | vib                  | 1276.0358 | 0.0 | 1   |                      |
| 82 | 12     | vib                  | 1450.2517 | 0.0 | 1   |                      |
| 83 | 13     | vib                  | 1979.8535 | 0.0 | 1   |                      |
| 84 | 14     | vib                  | 3145.6311 | 0.0 | 1   |                      |
| 85 | 15     | vib                  | 3237.4320 | 0.0 | 1   |                      |
| 86 | 16     | kro                  | 38.3121   | 1.0 | 1   | ! K-rotor            |

```

87 17 jro 111.0083 1.0 2 ! 2D adiabatic rotor
88
89 ctst rc-170 -45.09 1.7 0.0
90 C2H2O3
91 a) (blank comment line)
92 b) (blank comment line)
93 c) (blank comment line)
94 1 1 1
95 0.0 1
96 17 'HAR' AMUA
97 1 vib 265.3281 0.0 1
98 2 vib 439.0093 0.0 1
99 3 vib 517.4886 0.0 1
100 4 vib 531.3683 0.0 1
101 5 vib 738.2343 0.0 1
102 6 vib 922.7754 0.0 1
103 7 vib 950.1680 0.0 1
104 8 vib 1001.4307 0.0 1
105 9 vib 1050.7836 0.0 1
106 10 vib 1162.4843 0.0 1
107 11 vib 1270.9386 0.0 1
108 12 vib 1441.0780 0.0 1
109 13 vib 1966.0878 0.0 1
110 14 vib 3158.5782 0.0 1
111 15 vib 3260.7902 0.0 1
112 16 kro 39.6936 1.0 1 ! K-rotor
113 17 jro 112.0764 1.0 2 ! 2D adiabatic rotor
114
115 ctst rc-180 -37.31 1.8 0.0
116 C2H2O3
117 a) (blank comment line)
118 b) (blank comment line)
119 c) (blank comment line)
120 1 1 1
121 0.0 1
122 17 'HAR' AMUA
123 1 vib 254.8934 0.0 1
124 2 vib 261.8494 0.0 1
125 3 vib 516.2014 0.0 1
126 4 vib 536.8489 0.0 1
127 5 vib 719.6186 0.0 1
128 6 vib 855.2021 0.0 1
129 7 vib 939.8046 0.0 1
130 8 vib 1000.3981 0.0 1

```

|     |                         |        |           |     |     |                      |
|-----|-------------------------|--------|-----------|-----|-----|----------------------|
| 131 | 9                       | vib    | 1040.0081 | 0.0 | 1   |                      |
| 132 | 10                      | vib    | 1128.0332 | 0.0 | 1   |                      |
| 133 | 11                      | vib    | 1276.3843 | 0.0 | 1   |                      |
| 134 | 12                      | vib    | 1436.4178 | 0.0 | 1   |                      |
| 135 | 13                      | vib    | 1951.8550 | 0.0 | 1   |                      |
| 136 | 14                      | vib    | 3166.2232 | 0.0 | 1   |                      |
| 137 | 15                      | vib    | 3276.2410 | 0.0 | 1   |                      |
| 138 | 16                      | kro    | 41.1034   | 1.0 | 1   | ! K-rotor            |
| 139 | 17                      | jro    | 113.1958  | 1.0 | 2   | ! 2D adiabatic rotor |
| 140 |                         |        |           |     |     |                      |
| 141 | ctst                    | rc-190 | -29.14    | 1.9 | 0.0 |                      |
| 142 | C2H2O3                  |        |           |     |     |                      |
| 143 | a) (blank comment line) |        |           |     |     |                      |
| 144 | b) (blank comment line) |        |           |     |     |                      |
| 145 | c) (blank comment line) |        |           |     |     |                      |
| 146 | 1                       | 1      | 1         |     |     |                      |
| 147 | 0.0                     |        | 1         |     |     |                      |
| 148 | 16                      | 'HAR'  | AMUA      |     |     |                      |
| 149 | 1                       | vib    | 241.6475  | 0.0 | 1   |                      |
| 150 | 2                       | vib    | 511.8684  | 0.0 | 1   |                      |
| 151 | 3                       | vib    | 542.2182  | 0.0 | 1   |                      |
| 152 | 4                       | vib    | 700.8664  | 0.0 | 1   |                      |
| 153 | 5                       | vib    | 786.8424  | 0.0 | 1   |                      |
| 154 | 6                       | vib    | 927.5503  | 0.0 | 1   |                      |
| 155 | 7                       | vib    | 996.8544  | 0.0 | 1   |                      |
| 156 | 8                       | vib    | 1033.8431 | 0.0 | 1   |                      |
| 157 | 9                       | vib    | 1094.4125 | 0.0 | 1   |                      |
| 158 | 10                      | vib    | 1282.2545 | 0.0 | 1   |                      |
| 159 | 11                      | vib    | 1433.7900 | 0.0 | 1   |                      |
| 160 | 12                      | vib    | 1937.0968 | 0.0 | 1   |                      |
| 161 | 13                      | vib    | 3170.3743 | 0.0 | 1   |                      |
| 162 | 14                      | vib    | 3287.2007 | 0.0 | 1   |                      |
| 163 | 15                      | kro    | 42.5522   | 1.0 | 1   | ! K-rotor            |
| 164 | 16                      | jro    | 114.3471  | 1.0 | 2   | ! 2D adiabatic rotor |
| 165 |                         |        |           |     |     |                      |
| 166 | ctst                    | rc-200 | -20.99    | 2.0 | 0.0 |                      |
| 167 | C2H2O3                  |        |           |     |     |                      |
| 168 | a) (blank comment line) |        |           |     |     |                      |
| 169 | b) (blank comment line) |        |           |     |     |                      |
| 170 | c) (blank comment line) |        |           |     |     |                      |
| 171 | 1                       | 1      | 1         |     |     |                      |
| 172 | 0.0                     |        | 1         |     |     |                      |
| 173 | 16                      | 'HAR'  | AMUA      |     |     |                      |
| 174 | 1                       | vib    | 226.9239  | 0.0 | 1   |                      |

|     |        |                      |           |     |     |                      |
|-----|--------|----------------------|-----------|-----|-----|----------------------|
| 175 | 2      | vib                  | 504.2141  | 0.0 | 1   |                      |
| 176 | 3      | vib                  | 543.9503  | 0.0 | 1   |                      |
| 177 | 4      | vib                  | 683.8212  | 0.0 | 1   |                      |
| 178 | 5      | vib                  | 721.6322  | 0.0 | 1   |                      |
| 179 | 6      | vib                  | 917.6551  | 0.0 | 1   |                      |
| 180 | 7      | vib                  | 995.3888  | 0.0 | 1   |                      |
| 181 | 8      | vib                  | 1029.8394 | 0.0 | 1   |                      |
| 182 | 9      | vib                  | 1069.9976 | 0.0 | 1   |                      |
| 183 | 10     | vib                  | 1290.4826 | 0.0 | 1   |                      |
| 184 | 11     | vib                  | 1433.7586 | 0.0 | 1   |                      |
| 185 | 12     | vib                  | 1921.9115 | 0.0 | 1   |                      |
| 186 | 13     | vib                  | 3171.3910 | 0.0 | 1   |                      |
| 187 | 14     | vib                  | 3292.7333 | 0.0 | 1   |                      |
| 188 | 15     | kro                  | 43.8642   | 1.0 | 1   | ! K-rotor            |
| 189 | 16     | jro                  | 115.5559  | 1.0 | 2   | ! 2D adiabatic rotor |
| 190 |        |                      |           |     |     |                      |
| 191 | ctst   | rc-210               | -13.13    | 2.1 | 0.0 |                      |
| 192 | C2H2O3 |                      |           |     |     |                      |
| 193 | a)     | (blank comment line) |           |     |     |                      |
| 194 | b)     | (blank comment line) |           |     |     |                      |
| 195 | c)     | (blank comment line) |           |     |     |                      |
| 196 | 1      | 1                    | 1         |     |     |                      |
| 197 | 0.0    |                      | 1         |     |     |                      |
| 198 | 16     | 'HAR'                | AMUA      |     |     |                      |
| 199 | 1      | vib                  | 212.2406  | 0.0 | 1   |                      |
| 200 | 2      | vib                  | 494.0442  | 0.0 | 1   |                      |
| 201 | 3      | vib                  | 540.3273  | 0.0 | 1   |                      |
| 202 | 4      | vib                  | 659.9595  | 0.0 | 1   |                      |
| 203 | 5      | vib                  | 668.6052  | 0.0 | 1   |                      |
| 204 | 6      | vib                  | 906.2850  | 0.0 | 1   |                      |
| 205 | 7      | vib                  | 989.4404  | 0.0 | 1   |                      |
| 206 | 8      | vib                  | 1025.3138 | 0.0 | 1   |                      |
| 207 | 9      | vib                  | 1052.1726 | 0.0 | 1   |                      |
| 208 | 10     | vib                  | 1298.4768 | 0.0 | 1   |                      |
| 209 | 11     | vib                  | 1433.9797 | 0.0 | 1   |                      |
| 210 | 12     | vib                  | 1905.6419 | 0.0 | 1   |                      |
| 211 | 13     | vib                  | 3170.2834 | 0.0 | 1   |                      |
| 212 | 14     | vib                  | 3295.4117 | 0.0 | 1   |                      |
| 213 | 15     | kro                  | 45.1369   | 1.0 | 1   | ! K-rotor            |
| 214 | 16     | jro                  | 116.7984  | 1.0 | 2   | ! 2D adiabatic rotor |
| 215 |        |                      |           |     |     |                      |
| 216 | ctst   | rc-220               | -5.75     | 2.2 | 0.0 |                      |
| 217 | C2H2O3 |                      |           |     |     |                      |
| 218 | a)     | (blank comment line) |           |     |     |                      |

```

219 b) (blank comment line)
220 c) (blank comment line)
221 1 1 1
222 0.0 1
223 16 'HAR' AMUA
224 1 vib 194.9812 0.0 1
225 2 vib 480.6069 0.0 1
226 3 vib 524.3945 0.0 1
227 4 vib 608.2459 0.0 1
228 5 vib 655.3152 0.0 1
229 6 vib 898.8233 0.0 1
230 7 vib 984.5046 0.0 1
231 8 vib 1021.7438 0.0 1
232 9 vib 1039.7991 0.0 1
233 10 vib 1307.7032 0.0 1
234 11 vib 1436.0448 0.0 1
235 12 vib 1884.5254 0.0 1
236 13 vib 3169.4995 0.0 1
237 14 vib 3296.8632 0.0 1
238 15 kro 46.0334 1.0 1 ! K-rotor
239 16 jro 118.1831 1.0 2 ! 2D adiabatic rotor
240
241 ctst rc-230 0.99 2.3 0.0
242 C2H2O3
243 a) (blank comment line)
244 b) (blank comment line)
245 c) (blank comment line)
246 1 1 1
247 0.0 1
248 16 'HAR' AMUA
249 1 vib 181.8405 0.0 1
250 2 vib 463.2588 0.0 1
251 3 vib 487.7643 0.0 1
252 4 vib 591.4112 0.0 1
253 5 vib 643.5134 0.0 1
254 6 vib 894.0580 0.0 1
255 7 vib 975.3989 0.0 1
256 8 vib 1022.1220 0.0 1
257 9 vib 1036.4767 0.0 1
258 10 vib 1322.8171 0.0 1
259 11 vib 1442.5888 0.0 1
260 12 vib 1857.9725 0.0 1
261 13 vib 3168.2281 0.0 1
262 14 vib 3296.8641 0.0 1

```

|                             |      |        |           |     |     |                      |
|-----------------------------|------|--------|-----------|-----|-----|----------------------|
| 263                         | 15   | kro    | 46.5724   | 1.0 | 1   | ! K-rotor            |
| 264                         | 16   | jro    | 119.6647  | 1.0 | 2   | ! 2D adiabatic rotor |
| 265                         |      |        |           |     |     |                      |
| 266                         | ctst | rc-240 | 0.34      | 2.4 | 0.0 |                      |
| 267 C2H2O3                  |      |        |           |     |     |                      |
| 268 a) (blank comment line) |      |        |           |     |     |                      |
| 269 b) (blank comment line) |      |        |           |     |     |                      |
| 270 c) (blank comment line) |      |        |           |     |     |                      |
| 271                         | 1    | 1      | 1         |     |     |                      |
| 272                         | 0.0  |        | 1         |     |     |                      |
| 273                         | 17   | 'HAR'  | AMUA      |     |     |                      |
| 274                         | 1    | vib    | 78.6698   | 0.0 | 1   |                      |
| 275                         | 2    | vib    | 101.2804  | 0.0 | 1   |                      |
| 276                         | 3    | vib    | 206.9209  | 0.0 | 1   |                      |
| 277                         | 4    | vib    | 224.0470  | 0.0 | 1   |                      |
| 278                         | 5    | vib    | 302.7456  | 0.0 | 1   |                      |
| 279                         | 6    | vib    | 439.9100  | 0.0 | 1   |                      |
| 280                         | 7    | vib    | 595.9429  | 0.0 | 1   |                      |
| 281                         | 8    | vib    | 655.3106  | 0.0 | 1   |                      |
| 282                         | 9    | vib    | 991.2270  | 0.0 | 1   |                      |
| 283                         | 10   | vib    | 1188.4015 | 0.0 | 1   |                      |
| 284                         | 11   | vib    | 1419.1482 | 0.0 | 1   |                      |
| 285                         | 12   | vib    | 1603.1880 | 0.0 | 1   |                      |
| 286                         | 13   | vib    | 2260.4285 | 0.0 | 1   |                      |
| 287                         | 14   | vib    | 3214.3678 | 0.0 | 1   |                      |
| 288                         | 15   | vib    | 3318.3945 | 0.0 | 1   |                      |
| 289                         | 16   | kro    | 60.7885   | 1.0 | 1   | ! K-rotor            |
| 290                         | 17   | jro    | 147.9450  | 1.0 | 2   | ! 2D adiabatic rotor |
| 291                         |      |        |           |     |     |                      |
| 292                         | ctst | rc-250 | -0.55     | 2.5 | 0.0 |                      |
| 293 C2H2O3                  |      |        |           |     |     |                      |
| 294 a) (blank comment line) |      |        |           |     |     |                      |
| 295 b) (blank comment line) |      |        |           |     |     |                      |
| 296 c) (blank comment line) |      |        |           |     |     |                      |
| 297                         | 1    | 1      | 1         |     |     |                      |
| 298                         | 0.0  |        | 1         |     |     |                      |
| 299                         | 17   | 'HAR'  | AMUA      |     |     |                      |
| 300                         | 1    | vib    | 86.5574   | 0.0 | 1   |                      |
| 301                         | 2    | vib    | 112.5896  | 0.0 | 1   |                      |
| 302                         | 3    | vib    | 189.6400  | 0.0 | 1   |                      |
| 303                         | 4    | vib    | 194.6879  | 0.0 | 1   |                      |
| 304                         | 5    | vib    | 274.0480  | 0.0 | 1   |                      |
| 305                         | 6    | vib    | 441.2201  | 0.0 | 1   |                      |
| 306                         | 7    | vib    | 597.8937  | 0.0 | 1   |                      |

|     |                         |        |           |     |     |                      |
|-----|-------------------------|--------|-----------|-----|-----|----------------------|
| 307 | 8                       | vib    | 646.4352  | 0.0 | 1   |                      |
| 308 | 9                       | vib    | 990.8595  | 0.0 | 1   |                      |
| 309 | 10                      | vib    | 1188.3468 | 0.0 | 1   |                      |
| 310 | 11                      | vib    | 1418.6532 | 0.0 | 1   |                      |
| 311 | 12                      | vib    | 1627.7533 | 0.0 | 1   |                      |
| 312 | 13                      | vib    | 2259.7556 | 0.0 | 1   |                      |
| 313 | 14                      | vib    | 3214.0132 | 0.0 | 1   |                      |
| 314 | 15                      | vib    | 3317.7281 | 0.0 | 1   |                      |
| 315 | 16                      | kro    | 61.2086   | 1.0 | 1   | ! K-rotor            |
| 316 | 17                      | jro    | 150.8868  | 1.0 | 2   | ! 2D adiabatic rotor |
| 317 |                         |        |           |     |     |                      |
| 318 | ctst                    | rc-260 | -1.16     | 2.6 | 0.0 |                      |
| 319 | C2H2O3                  |        |           |     |     |                      |
| 320 | a) (blank comment line) |        |           |     |     |                      |
| 321 | b) (blank comment line) |        |           |     |     |                      |
| 322 | c) (blank comment line) |        |           |     |     |                      |
| 323 | 1                       | 1      | 1         |     |     |                      |
| 324 | 0.0                     |        | 1         |     |     |                      |
| 325 | 17                      | 'HAR'  | AMUA      |     |     |                      |
| 326 | 1                       | vib    | 95.7572   | 0.0 | 1   |                      |
| 327 | 2                       | vib    | 113.2189  | 0.0 | 1   |                      |
| 328 | 3                       | vib    | 168.5842  | 0.0 | 1   |                      |
| 329 | 4                       | vib    | 179.9844  | 0.0 | 1   |                      |
| 330 | 5                       | vib    | 247.4917  | 0.0 | 1   |                      |
| 331 | 6                       | vib    | 442.7758  | 0.0 | 1   |                      |
| 332 | 7                       | vib    | 592.5716  | 0.0 | 1   |                      |
| 333 | 8                       | vib    | 642.1746  | 0.0 | 1   |                      |
| 334 | 9                       | vib    | 990.8881  | 0.0 | 1   |                      |
| 335 | 10                      | vib    | 1187.9100 | 0.0 | 1   |                      |
| 336 | 11                      | vib    | 1418.6331 | 0.0 | 1   |                      |
| 337 | 12                      | vib    | 1646.1454 | 0.0 | 1   |                      |
| 338 | 13                      | vib    | 2257.9098 | 0.0 | 1   |                      |
| 339 | 14                      | vib    | 3212.4341 | 0.0 | 1   |                      |
| 340 | 15                      | vib    | 3315.7731 | 0.0 | 1   |                      |
| 341 | 16                      | kro    | 61.2868   | 1.0 | 1   | ! K-rotor            |
| 342 | 17                      | jro    | 154.1488  | 1.0 | 2   | ! 2D adiabatic rotor |
| 343 |                         |        |           |     |     |                      |
| 344 | ctst                    | rc-270 | -1.54     | 2.7 | 0.0 |                      |
| 345 | C2H2O3                  |        |           |     |     |                      |
| 346 | a) (blank comment line) |        |           |     |     |                      |
| 347 | b) (blank comment line) |        |           |     |     |                      |
| 348 | c) (blank comment line) |        |           |     |     |                      |
| 349 | 1                       | 1      | 1         |     |     |                      |
| 350 | 0.0                     |        | 1         |     |     |                      |



|     |      |                      |           |     |     |                      |
|-----|------|----------------------|-----------|-----|-----|----------------------|
| 351 | 17   | 'HAR'                | AMUA      |     |     |                      |
| 352 | 1    | vib                  | 94.7088   | 0.0 | 1   |                      |
| 353 | 2    | vib                  | 110.6155  | 0.0 | 1   |                      |
| 354 | 3    | vib                  | 156.2284  | 0.0 | 1   |                      |
| 355 | 4    | vib                  | 171.1573  | 0.0 | 1   |                      |
| 356 | 5    | vib                  | 223.9826  | 0.0 | 1   |                      |
| 357 | 6    | vib                  | 443.5970  | 0.0 | 1   |                      |
| 358 | 7    | vib                  | 594.0283  | 0.0 | 1   |                      |
| 359 | 8    | vib                  | 637.4318  | 0.0 | 1   |                      |
| 360 | 9    | vib                  | 990.8128  | 0.0 | 1   |                      |
| 361 | 10   | vib                  | 1187.6173 | 0.0 | 1   |                      |
| 362 | 11   | vib                  | 1418.3236 | 0.0 | 1   |                      |
| 363 | 12   | vib                  | 1663.3110 | 0.0 | 1   |                      |
| 364 | 13   | vib                  | 2256.8508 | 0.0 | 1   |                      |
| 365 | 14   | vib                  | 3212.5279 | 0.0 | 1   |                      |
| 366 | 15   | vib                  | 3315.9058 | 0.0 | 1   |                      |
| 367 | 16   | kro                  | 61.0943   | 1.0 | 1   | ! K-rotor            |
| 368 | 17   | jro                  | 158.3159  | 1.0 | 2   | ! 2D adiabatic rotor |
| 369 |      |                      |           |     |     |                      |
| 370 | ctst | rc-280               | -1.75     | 2.8 | 0.0 |                      |
| 371 |      | C2H2O3               |           |     |     |                      |
| 372 | a)   | (blank comment line) |           |     |     |                      |
| 373 | b)   | (blank comment line) |           |     |     |                      |
| 374 | c)   | (blank comment line) |           |     |     |                      |
| 375 | 1    | 1                    | 1         |     |     |                      |
| 376 | 0.0  |                      | 1         |     |     |                      |
| 377 | 17   | 'HAR'                | AMUA      |     |     |                      |
| 378 | 1    | vib                  | 94.6352   | 0.0 | 1   |                      |
| 379 | 2    | vib                  | 107.5591  | 0.0 | 1   |                      |
| 380 | 3    | vib                  | 131.7222  | 0.0 | 1   |                      |
| 381 | 4    | vib                  | 160.2442  | 0.0 | 1   |                      |
| 382 | 5    | vib                  | 200.1536  | 0.0 | 1   |                      |
| 383 | 6    | vib                  | 444.4280  | 0.0 | 1   |                      |
| 384 | 7    | vib                  | 589.7787  | 0.0 | 1   |                      |
| 385 | 8    | vib                  | 633.6105  | 0.0 | 1   |                      |
| 386 | 9    | vib                  | 990.5615  | 0.0 | 1   |                      |
| 387 | 10   | vib                  | 1186.8777 | 0.0 | 1   |                      |
| 388 | 11   | vib                  | 1418.1262 | 0.0 | 1   |                      |
| 389 | 12   | vib                  | 1675.7358 | 0.0 | 1   |                      |
| 390 | 13   | vib                  | 2255.2984 | 0.0 | 1   |                      |
| 391 | 14   | vib                  | 3212.5877 | 0.0 | 1   |                      |
| 392 | 15   | vib                  | 3315.5155 | 0.0 | 1   |                      |
| 393 | 16   | kro                  | 60.7339   | 1.0 | 1   | ! K-rotor            |
| 394 | 17   | jro                  | 163.0593  | 1.0 | 2   | ! 2D adiabatic rotor |

```

395
396 ctst rc-290 -1.84 2.9 0.0
397 C2H2O3
398 a) (blank comment line)
399 b) (blank comment line)
400 c) (blank comment line)
401 1 1 1
402 0.0 1
403 17 'HAR' AMUA
404 1 vib 91.4470 0.0 1
405 2 vib 107.8165 0.0 1
406 3 vib 116.1796 0.0 1
407 4 vib 148.6061 0.0 1
408 5 vib 180.4860 0.0 1
409 6 vib 444.5759 0.0 1
410 7 vib 589.7522 0.0 1
411 8 vib 629.4928 0.0 1
412 9 vib 990.4059 0.0 1
413 10 vib 1186.7735 0.0 1
414 11 vib 1418.0141 0.0 1
415 12 vib 1687.4244 0.0 1
416 13 vib 2254.8299 0.0 1
417 14 vib 3213.4627 0.0 1
418 15 vib 3316.3050 0.0 1
419 16 kro 60.2002 1.0 1 ! K-rotor
420 17 jro 168.0164 1.0 2 ! 2D adiabatic rotor
421
422 ctst rc-300 -1.83 3.0 0.0
423 C2H2O3
424 a) (blank comment line)
425 b) (blank comment line)
426 c) (blank comment line)
427 1 1 1
428 0.0 1
429 17 'HAR' AMUA
430 1 vib 86.7727 0.0 1
431 2 vib 88.0163 0.0 1
432 3 vib 113.9716 0.0 1
433 4 vib 144.0897 0.0 1
434 5 vib 163.1046 0.0 1
435 6 vib 444.7222 0.0 1
436 7 vib 588.0758 0.0 1
437 8 vib 627.4670 0.0 1
438 9 vib 990.2480 0.0 1

```

|     |                         |        |           |     |     |                      |
|-----|-------------------------|--------|-----------|-----|-----|----------------------|
| 439 | 10                      | vib    | 1186.0532 | 0.0 | 1   |                      |
| 440 | 11                      | vib    | 1417.1942 | 0.0 | 1   |                      |
| 441 | 12                      | vib    | 1698.0122 | 0.0 | 1   |                      |
| 442 | 13                      | vib    | 2253.4858 | 0.0 | 1   |                      |
| 443 | 14                      | vib    | 3213.0629 | 0.0 | 1   |                      |
| 444 | 15                      | vib    | 3315.7835 | 0.0 | 1   |                      |
| 445 | 16                      | kro    | 59.7967   | 1.0 | 1   | ! K-rotor            |
| 446 | 17                      | jro    | 175.0601  | 1.0 | 2   | ! 2D adiabatic rotor |
| 447 |                         |        |           |     |     |                      |
| 448 | ctst                    | rc-330 | -1.04     | 3.3 | 0.0 |                      |
| 449 | C2H2O3                  |        |           |     |     |                      |
| 450 | a) (blank comment line) |        |           |     |     |                      |
| 451 | b) (blank comment line) |        |           |     |     |                      |
| 452 | c) (blank comment line) |        |           |     |     |                      |
| 453 | 1                       | 1      | 1         |     |     |                      |
| 454 | 0.0                     |        | 1         |     |     |                      |
| 455 | 16                      | 'HAR'  | AMUA      |     |     |                      |
| 456 | 1                       | vib    | 43.6270   | 0.0 | 1   |                      |
| 457 | 2                       | vib    | 73.5357   | 0.0 | 1   |                      |
| 458 | 3                       | vib    | 96.6987   | 0.0 | 1   |                      |
| 459 | 4                       | vib    | 132.0331  | 0.0 | 1   |                      |
| 460 | 5                       | vib    | 440.3161  | 0.0 | 1   |                      |
| 461 | 6                       | vib    | 575.1974  | 0.0 | 1   |                      |
| 462 | 7                       | vib    | 596.2242  | 0.0 | 1   |                      |
| 463 | 8                       | vib    | 987.3721  | 0.0 | 1   |                      |
| 464 | 9                       | vib    | 1187.5375 | 0.0 | 1   |                      |
| 465 | 10                      | vib    | 1416.2136 | 0.0 | 1   |                      |
| 466 | 11                      | vib    | 1751.3690 | 0.0 | 1   |                      |
| 467 | 12                      | vib    | 2256.6697 | 0.0 | 1   |                      |
| 468 | 13                      | vib    | 3222.5815 | 0.0 | 1   |                      |
| 469 | 14                      | vib    | 3325.4316 | 0.0 | 1   |                      |
| 470 | 15                      | kro    | 61.2917   | 1.0 | 1   | ! K-rotor            |
| 471 | 16                      | jro    | 191.0352  | 1.0 | 2   | ! 2D adiabatic rotor |
| 472 |                         |        |           |     |     |                      |
| 473 | ctst                    | rc-340 | -1.43     | 3.4 | 0.0 |                      |
| 474 | C2H2O3                  |        |           |     |     |                      |
| 475 | a) (blank comment line) |        |           |     |     |                      |
| 476 | b) (blank comment line) |        |           |     |     |                      |
| 477 | c) (blank comment line) |        |           |     |     |                      |
| 478 | 1                       | 1      | 1         |     |     |                      |
| 479 | 0.0                     |        | 1         |     |     |                      |
| 480 | 17                      | 'HAR'  | AMUA      |     |     |                      |
| 481 | 1                       | vib    | 33.5095   | 0.0 | 1   |                      |
| 482 | 2                       | vib    | 72.0239   | 0.0 | 1   |                      |

|     |                         |        |           |     |     |                      |
|-----|-------------------------|--------|-----------|-----|-----|----------------------|
| 483 | 3                       | vib    | 105.0161  | 0.0 | 1   |                      |
| 484 | 4                       | vib    | 115.2509  | 0.0 | 1   |                      |
| 485 | 5                       | vib    | 135.6504  | 0.0 | 1   |                      |
| 486 | 6                       | vib    | 444.2914  | 0.0 | 1   |                      |
| 487 | 7                       | vib    | 584.0372  | 0.0 | 1   |                      |
| 488 | 8                       | vib    | 621.6682  | 0.0 | 1   |                      |
| 489 | 9                       | vib    | 989.8608  | 0.0 | 1   |                      |
| 490 | 10                      | vib    | 1184.4599 | 0.0 | 1   |                      |
| 491 | 11                      | vib    | 1415.3047 | 0.0 | 1   |                      |
| 492 | 12                      | vib    | 1722.3427 | 0.0 | 1   |                      |
| 493 | 13                      | vib    | 2250.9054 | 0.0 | 1   |                      |
| 494 | 14                      | vib    | 3214.2884 | 0.0 | 1   |                      |
| 495 | 15                      | vib    | 3317.3000 | 0.0 | 1   |                      |
| 496 | 16                      | kro    | 56.6376   | 1.0 | 1   | ! K-rotor            |
| 497 | 17                      | jro    | 197.1613  | 1.0 | 2   | ! 2D adiabatic rotor |
| 498 |                         |        |           |     |     |                      |
| 499 | ctst                    | rc-350 | -1.08     | 3.5 | 0.0 |                      |
| 500 | C2H2O3                  |        |           |     |     |                      |
| 501 | a) (blank comment line) |        |           |     |     |                      |
| 502 | b) (blank comment line) |        |           |     |     |                      |
| 503 | c) (blank comment line) |        |           |     |     |                      |
| 504 | 1                       | 1      | 1         |     |     |                      |
| 505 | 0.0                     |        | 1         |     |     |                      |
| 506 | 17                      | 'HAR'  | AMUA      |     |     |                      |
| 507 | 1                       | vib    | 32.7323   | 0.0 | 1   |                      |
| 508 | 2                       | vib    | 55.9247   | 0.0 | 1   |                      |
| 509 | 3                       | vib    | 63.3649   | 0.0 | 1   |                      |
| 510 | 4                       | vib    | 83.6348   | 0.0 | 1   |                      |
| 511 | 5                       | vib    | 120.8554  | 0.0 | 1   |                      |
| 512 | 6                       | vib    | 451.7469  | 0.0 | 1   |                      |
| 513 | 7                       | vib    | 580.3361  | 0.0 | 1   |                      |
| 514 | 8                       | vib    | 613.3051  | 0.0 | 1   |                      |
| 515 | 9                       | vib    | 991.8030  | 0.0 | 1   |                      |
| 516 | 10                      | vib    | 1184.2156 | 0.0 | 1   |                      |
| 517 | 11                      | vib    | 1417.6672 | 0.0 | 1   |                      |
| 518 | 12                      | vib    | 1749.8734 | 0.0 | 1   |                      |
| 519 | 13                      | vib    | 2246.8915 | 0.0 | 1   |                      |
| 520 | 14                      | vib    | 3204.1906 | 0.0 | 1   |                      |
| 521 | 15                      | vib    | 3305.1388 | 0.0 | 1   |                      |
| 522 | 16                      | kro    | 60.8026   | 1.0 | 1   | ! K-rotor            |
| 523 | 17                      | jro    | 207.4538  | 1.0 | 2   | ! 2D adiabatic rotor |
| 524 |                         |        |           |     |     |                      |
| 525 | ctst                    | rc-380 | -1.00     | 3.8 | 0.0 |                      |
| 526 | C2H2O3                  |        |           |     |     |                      |

```

527 a) (blank comment line)
528 b) (blank comment line)
529 c) (blank comment line)
530 1 1 1
531 0.0 1
532 16 'HAR' AMUA
533 1 vib 15.8970 0.0 1
534 2 vib 41.0079 0.0 1
535 3 vib 64.9393 0.0 1
536 4 vib 77.5924 0.0 1
537 5 vib 445.4845 0.0 1
538 6 vib 578.2460 0.0 1
539 7 vib 607.9415 0.0 1
540 8 vib 987.9982 0.0 1
541 9 vib 1184.6945 0.0 1
542 10 vib 1415.7673 0.0 1
543 11 vib 1750.6238 0.0 1
544 12 vib 2246.3046 0.0 1
545 13 vib 3218.2822 0.0 1
546 14 vib 3318.7688 0.0 1
547 15 kro 58.0250 1.0 1 ! K-rotor
548 16 jro 225.3691 1.0 2 ! 2D adiabatic rotor
549
550 ctst rc-440 -0.67 4.4 0.0
551 C2H2O3
552 a) (blank comment line)
553 b) (blank comment line)
554 c) (blank comment line)
555 1 1 1
556 0.0 1
557 16 'HAR' AMUA
558 1 vib -12.5166 0.0 1
559 2 vib 32.3314 0.0 1
560 3 vib 41.6521 0.0 1
561 4 vib 62.9432 0.0 1
562 5 vib 445.9579 0.0 1
563 6 vib 577.4973 0.0 1
564 7 vib 613.2254 0.0 1
565 8 vib 988.3749 0.0 1
566 9 vib 1185.4402 0.0 1
567 10 vib 1415.7856 0.0 1
568 11 vib 1750.7014 0.0 1
569 12 vib 2253.3227 0.0 1
570 13 vib 3216.3932 0.0 1

```

|                             |      |        |           |     |     |                      |
|-----------------------------|------|--------|-----------|-----|-----|----------------------|
| 571                         | 14   | vib    | 3317.3789 | 0.0 | 1   |                      |
| 572                         | 15   | kro    | 28.8646   | 1.0 | 1   | ! K-rotor            |
| 573                         | 16   | jro    | 305.1456  | 1.0 | 2   | ! 2D adiabatic rotor |
| 574                         |      |        |           |     |     |                      |
| 575                         | ctst | rc-480 | -0.12     | 4.8 | 0.0 |                      |
| 576 C2H2O3                  |      |        |           |     |     |                      |
| 577 a) (blank comment line) |      |        |           |     |     |                      |
| 578 b) (blank comment line) |      |        |           |     |     |                      |
| 579 c) (blank comment line) |      |        |           |     |     |                      |
| 580                         | 1    | 1      | 1         |     |     |                      |
| 581                         | 0.0  |        | 1         |     |     |                      |
| 582                         | 16   | 'HAR'  | AMUA      |     |     |                      |
| 583                         | 1    | vib    | -29.5427  | 0.0 | 1   |                      |
| 584                         | 2    | vib    | -13.6504  | 0.0 | 1   |                      |
| 585                         | 3    | vib    | 9.5630    | 0.0 | 1   |                      |
| 586                         | 4    | vib    | 15.6995   | 0.0 | 1   |                      |
| 587                         | 5    | vib    | 445.4409  | 0.0 | 1   |                      |
| 588                         | 6    | vib    | 575.8558  | 0.0 | 1   |                      |
| 589                         | 7    | vib    | 608.2023  | 0.0 | 1   |                      |
| 590                         | 8    | vib    | 988.8206  | 0.0 | 1   |                      |
| 591                         | 9    | vib    | 1184.6763 | 0.0 | 1   |                      |
| 592                         | 10   | vib    | 1415.4482 | 0.0 | 1   |                      |
| 593                         | 11   | vib    | 1751.9601 | 0.0 | 1   |                      |
| 594                         | 12   | vib    | 2256.7546 | 0.0 | 1   |                      |
| 595                         | 13   | vib    | 3216.3793 | 0.0 | 1   |                      |
| 596                         | 14   | vib    | 3316.8827 | 0.0 | 1   |                      |
| 597                         | 15   | kro    | 58.3864   | 1.0 | 1   | ! K-rotor            |
| 598                         | 16   | jro    | 419.3487  | 1.0 | 2   | ! 2D adiabatic rotor |
| 599                         |      |        |           |     |     |                      |
| 600                         | ctst | rc-490 | 0.03      | 4.9 | 0.0 |                      |
| 601 C2H2O3                  |      |        |           |     |     |                      |
| 602 a) (blank comment line) |      |        |           |     |     |                      |
| 603 b) (blank comment line) |      |        |           |     |     |                      |
| 604 c) (blank comment line) |      |        |           |     |     |                      |
| 605                         | 1    | 1      | 1         |     |     |                      |
| 606                         | 0.0  |        | 1         |     |     |                      |
| 607                         | 16   | 'HAR'  | AMUA      |     |     |                      |
| 608                         | 1    | vib    | -24.0902  | 0.0 | 1   |                      |
| 609                         | 2    | vib    | 6.2468    | 0.0 | 1   |                      |
| 610                         | 3    | vib    | 9.2451    | 0.0 | 1   |                      |
| 611                         | 4    | vib    | 15.2759   | 0.0 | 1   |                      |
| 612                         | 5    | vib    | 446.7848  | 0.0 | 1   |                      |
| 613                         | 6    | vib    | 576.7575  | 0.0 | 1   |                      |
| 614                         | 7    | vib    | 608.7507  | 0.0 | 1   |                      |

|     |        |                      |           |     |     |                      |
|-----|--------|----------------------|-----------|-----|-----|----------------------|
| 615 | 8      | vib                  | 989.9390  | 0.0 | 1   |                      |
| 616 | 9      | vib                  | 1184.7237 | 0.0 | 1   |                      |
| 617 | 10     | vib                  | 1416.3010 | 0.0 | 1   |                      |
| 618 | 11     | vib                  | 1750.1384 | 0.0 | 1   |                      |
| 619 | 12     | vib                  | 2255.0993 | 0.0 | 1   |                      |
| 620 | 13     | vib                  | 3216.0779 | 0.0 | 1   |                      |
| 621 | 14     | vib                  | 3317.0761 | 0.0 | 1   |                      |
| 622 | 15     | kro                  | 57.0853   | 1.0 | 1   | ! K-rotor            |
| 623 | 16     | jro                  | 442.0890  | 1.0 | 2   | ! 2D adiabatic rotor |
| 624 |        |                      |           |     |     |                      |
| 625 | ctst   | rc-530               | -0.04     | 5.3 | 0.0 |                      |
| 626 | C2H2O3 |                      |           |     |     |                      |
| 627 | a)     | (blank comment line) |           |     |     |                      |
| 628 | b)     | (blank comment line) |           |     |     |                      |
| 629 | c)     | (blank comment line) |           |     |     |                      |
| 630 | 1      | 1                    | 1         |     |     |                      |
| 631 | 0.0    |                      | 1         |     |     |                      |
| 632 | 16     | 'HAR'                | AMUA      |     |     |                      |
| 633 | 1      | vib                  | 13.6299   | 0.0 | 1   |                      |
| 634 | 2      | vib                  | 2.4793    | 0.0 | 1   |                      |
| 635 | 3      | vib                  | 10.1539   | 0.0 | 1   |                      |
| 636 | 4      | vib                  | 25.9838   | 0.0 | 1   |                      |
| 637 | 5      | vib                  | 446.7732  | 0.0 | 1   |                      |
| 638 | 6      | vib                  | 576.3157  | 0.0 | 1   |                      |
| 639 | 7      | vib                  | 609.3841  | 0.0 | 1   |                      |
| 640 | 8      | vib                  | 989.9787  | 0.0 | 1   |                      |
| 641 | 9      | vib                  | 1184.7971 | 0.0 | 1   |                      |
| 642 | 10     | vib                  | 1416.4696 | 0.0 | 1   |                      |
| 643 | 11     | vib                  | 1750.1274 | 0.0 | 1   |                      |
| 644 | 12     | vib                  | 2256.1002 | 0.0 | 1   |                      |
| 645 | 13     | vib                  | 3215.4770 | 0.0 | 1   |                      |
| 646 | 14     | vib                  | 3316.3102 | 0.0 | 1   |                      |
| 647 | 15     | kro                  | 57.2701   | 1.0 | 1   | ! K-rotor            |
| 648 | 16     | jro                  | 502.1917  | 1.0 | 2   | ! 2D adiabatic rotor |
| 649 |        |                      |           |     |     |                      |
| 650 | ctst   | rc-540               | -0.03     | 5.4 | 0.0 |                      |
| 651 | C2H2O3 |                      |           |     |     |                      |
| 652 | a)     | (blank comment line) |           |     |     |                      |
| 653 | b)     | (blank comment line) |           |     |     |                      |
| 654 | c)     | (blank comment line) |           |     |     |                      |
| 655 | 1      | 1                    | 1         |     |     |                      |
| 656 | 0.0    |                      | 1         |     |     |                      |
| 657 | 16     | 'HAR'                | AMUA      |     |     |                      |
| 658 | 1      | vib                  | 8.2796    | 0.0 | 1   |                      |

|     |                         |        |           |     |     |                      |
|-----|-------------------------|--------|-----------|-----|-----|----------------------|
| 659 | 2                       | vib    | 11.5026   | 0.0 | 1   |                      |
| 660 | 3                       | vib    | 16.5436   | 0.0 | 1   |                      |
| 661 | 4                       | vib    | 25.9694   | 0.0 | 1   |                      |
| 662 | 5                       | vib    | 446.6924  | 0.0 | 1   |                      |
| 663 | 6                       | vib    | 576.4410  | 0.0 | 1   |                      |
| 664 | 7                       | vib    | 609.2944  | 0.0 | 1   |                      |
| 665 | 8                       | vib    | 989.9678  | 0.0 | 1   |                      |
| 666 | 9                       | vib    | 1184.8010 | 0.0 | 1   |                      |
| 667 | 10                      | vib    | 1416.4402 | 0.0 | 1   |                      |
| 668 | 11                      | vib    | 1749.8922 | 0.0 | 1   |                      |
| 669 | 12                      | vib    | 2256.1289 | 0.0 | 1   |                      |
| 670 | 13                      | vib    | 3215.5917 | 0.0 | 1   |                      |
| 671 | 14                      | vib    | 3316.4659 | 0.0 | 1   |                      |
| 672 | 15                      | kro    | 57.2157   | 1.0 | 1   | ! K-rotor            |
| 673 | 16                      | jro    | 520.8527  | 1.0 | 2   | ! 2D adiabatic rotor |
| 674 |                         |        |           |     |     |                      |
| 675 | ctst                    | rc-550 | -0.02     | 5.5 | 0.0 |                      |
| 676 | C2H2O3                  |        |           |     |     |                      |
| 677 | a) (blank comment line) |        |           |     |     |                      |
| 678 | b) (blank comment line) |        |           |     |     |                      |
| 679 | c) (blank comment line) |        |           |     |     |                      |
| 680 | 1                       | 1      | 1         |     |     |                      |
| 681 | 0.0                     |        | 1         |     |     |                      |
| 682 | 16                      | 'HAR'  | AMUA      |     |     |                      |
| 683 | 1                       | vib    | 6.4453    | 0.0 | 1   |                      |
| 684 | 2                       | vib    | 7.4243    | 0.0 | 1   |                      |
| 685 | 3                       | vib    | 10.2035   | 0.0 | 1   |                      |
| 686 | 4                       | vib    | 25.2400   | 0.0 | 1   |                      |
| 687 | 5                       | vib    | 446.6548  | 0.0 | 1   |                      |
| 688 | 6                       | vib    | 576.5097  | 0.0 | 1   |                      |
| 689 | 7                       | vib    | 609.2484  | 0.0 | 1   |                      |
| 690 | 8                       | vib    | 989.9604  | 0.0 | 1   |                      |
| 691 | 9                       | vib    | 1184.8117 | 0.0 | 1   |                      |
| 692 | 10                      | vib    | 1416.4362 | 0.0 | 1   |                      |
| 693 | 11                      | vib    | 1749.8871 | 0.0 | 1   |                      |
| 694 | 12                      | vib    | 2256.1452 | 0.0 | 1   |                      |
| 695 | 13                      | vib    | 3215.6198 | 0.0 | 1   |                      |
| 696 | 14                      | vib    | 3316.5033 | 0.0 | 1   |                      |
| 697 | 15                      | kro    | 57.1631   | 1.0 | 1   | ! K-rotor            |
| 698 | 16                      | jro    | 539.8341  | 1.0 | 2   | ! 2D adiabatic rotor |
| 699 |                         |        |           |     |     |                      |
| 700 | ctst                    | rc-560 | -0.02     | 5.6 | 0.0 |                      |
| 701 | C2H2O3                  |        |           |     |     |                      |
| 702 | a) (blank comment line) |        |           |     |     |                      |



```

703 b) (blank comment line)
704 c) (blank comment line)
705 1 1 1
706 0.0 1
707 16 'HAR' AMUA
708 1 vib 10.8392 0.0 1
709 2 vib 8.2402 0.0 1
710 3 vib 25.0544 0.0 1
711 4 vib 34.0218 0.0 1
712 5 vib 447.6057 0.0 1
713 6 vib 576.9653 0.0 1
714 7 vib 611.7792 0.0 1
715 8 vib 989.8048 0.0 1
716 9 vib 1184.5908 0.0 1
717 10 vib 1416.6586 0.0 1
718 11 vib 1749.7937 0.0 1
719 12 vib 2255.0014 0.0 1
720 13 vib 3214.1797 0.0 1
721 14 vib 3314.3371 0.0 1
722 15 kro 57.5263 1.0 1 ! K-rotor
723 16 jro 562.1324 1.0 2 ! 2D adiabatic rotor
724
725 ctst rc-570 -0.01 5.7 0.0
726 C2H2O3
727 a) (blank comment line)
728 b) (blank comment line)
729 c) (blank comment line)
730 1 1 1
731 0.0 1
732 16 'HAR' AMUA
733 1 vib 12.3174 0.0 1
734 2 vib 6.7288 0.0 1
735 3 vib 9.7290 0.0 1
736 4 vib 23.7084 0.0 1
737 5 vib 446.5902 0.0 1
738 6 vib 576.3762 0.0 1
739 7 vib 609.2093 0.0 1
740 8 vib 989.9439 0.0 1
741 9 vib 1184.8373 0.0 1
742 10 vib 1416.4320 0.0 1
743 11 vib 1749.6731 0.0 1
744 12 vib 2255.9546 0.0 1
745 13 vib 3215.6885 0.0 1
746 14 vib 3316.5915 0.0 1

```

|     |                         |        |           |     |     |                      |
|-----|-------------------------|--------|-----------|-----|-----|----------------------|
| 747 | 15                      | kro    | 57.1496   | 1.0 | 1   | ! K-rotor            |
| 748 | 16                      | jro    | 576.1782  | 1.0 | 2   | ! 2D adiabatic rotor |
| 749 |                         |        |           |     |     |                      |
| 750 | ctst                    | rc-580 | -0.01     | 5.8 | 0.0 |                      |
| 751 | C2H2O3                  |        |           |     |     |                      |
| 752 | a) (blank comment line) |        |           |     |     |                      |
| 753 | b) (blank comment line) |        |           |     |     |                      |
| 754 | c) (blank comment line) |        |           |     |     |                      |
| 755 | 1                       | 1      | 1         |     |     |                      |
| 756 | 0.0                     |        | 1         |     |     |                      |
| 757 | 15                      | 'HAR'  | AMUA      |     |     |                      |
| 758 | 1                       | vib    | 39.9014   | 0.0 | 1   |                      |
| 759 | 2                       | vib    | 17.2308   | 0.0 | 1   |                      |
| 760 | 3                       | vib    | 23.8206   | 0.0 | 1   |                      |
| 761 | 4                       | vib    | 445.9114  | 0.0 | 1   |                      |
| 762 | 5                       | vib    | 575.8910  | 0.0 | 1   |                      |
| 763 | 6                       | vib    | 608.4413  | 0.0 | 1   |                      |
| 764 | 7                       | vib    | 989.3311  | 0.0 | 1   |                      |
| 765 | 8                       | vib    | 1184.5516 | 0.0 | 1   |                      |
| 766 | 9                       | vib    | 1415.6040 | 0.0 | 1   |                      |
| 767 | 10                      | vib    | 1750.1002 | 0.0 | 1   |                      |
| 768 | 11                      | vib    | 2255.9212 | 0.0 | 1   |                      |
| 769 | 12                      | vib    | 3216.9363 | 0.0 | 1   |                      |
| 770 | 13                      | vib    | 3317.7695 | 0.0 | 1   |                      |
| 771 | 14                      | kro    | 51.3438   | 1.0 | 1   | ! K-rotor            |
| 772 | 15                      | jro    | 565.0934  | 1.0 | 2   | ! 2D adiabatic rotor |
| 773 |                         |        |           |     |     |                      |
| 774 | ctst                    | rc-600 | 0.00      | 6.0 | 0.0 |                      |
| 775 | C2H2O3                  |        |           |     |     |                      |
| 776 | a) (blank comment line) |        |           |     |     |                      |
| 777 | b) (blank comment line) |        |           |     |     |                      |
| 778 | c) (blank comment line) |        |           |     |     |                      |
| 779 | 1                       | 1      | 1         |     |     |                      |
| 780 | 0.0                     |        | 1         |     |     |                      |
| 781 | 16                      | 'HAR'  | AMUA      |     |     |                      |
| 782 | 1                       | vib    | 18.5132   | 0.0 | 1   |                      |
| 783 | 2                       | vib    | 7.2983    | 0.0 | 1   |                      |
| 784 | 3                       | vib    | 2.9746    | 0.0 | 1   |                      |
| 785 | 4                       | vib    | 16.3869   | 0.0 | 1   |                      |
| 786 | 5                       | vib    | 446.0252  | 0.0 | 1   |                      |
| 787 | 6                       | vib    | 576.5858  | 0.0 | 1   |                      |
| 788 | 7                       | vib    | 609.0697  | 0.0 | 1   |                      |
| 789 | 8                       | vib    | 989.3770  | 0.0 | 1   |                      |
| 790 | 9                       | vib    | 1184.5126 | 0.0 | 1   |                      |

|     |                         |        |           |     |     |                      |
|-----|-------------------------|--------|-----------|-----|-----|----------------------|
| 791 | 10                      | vib    | 1415.5826 | 0.0 | 1   |                      |
| 792 | 11                      | vib    | 1749.5646 | 0.0 | 1   |                      |
| 793 | 12                      | vib    | 2255.9852 | 0.0 | 1   |                      |
| 794 | 13                      | vib    | 3216.9462 | 0.0 | 1   |                      |
| 795 | 14                      | vib    | 3317.7995 | 0.0 | 1   |                      |
| 796 | 15                      | kro    | 49.1197   | 1.0 | 1   | ! K-rotor            |
| 797 | 16                      | jro    | 620.4779  | 1.0 | 2   | ! 2D adiabatic rotor |
| 798 |                         |        |           |     |     |                      |
| 799 | ctst                    | rc-680 | 0.00      | 6.8 | 0.0 |                      |
| 800 | C2H2O3                  |        |           |     |     |                      |
| 801 | a) (blank comment line) |        |           |     |     |                      |
| 802 | b) (blank comment line) |        |           |     |     |                      |
| 803 | c) (blank comment line) |        |           |     |     |                      |
| 804 | 1                       | 1      | 1         |     |     |                      |
| 805 | 0.0                     |        | 1         |     |     |                      |
| 806 | 16                      | 'HAR'  | AMUA      |     |     |                      |
| 807 | 1                       | vib    | -4.9877   | 0.0 | 1   |                      |
| 808 | 2                       | vib    | 0.7339    | 0.0 | 1   |                      |
| 809 | 3                       | vib    | 14.2613   | 0.0 | 1   |                      |
| 810 | 4                       | vib    | 32.5332   | 0.0 | 1   |                      |
| 811 | 5                       | vib    | 447.0289  | 0.0 | 1   |                      |
| 812 | 6                       | vib    | 576.8571  | 0.0 | 1   |                      |
| 813 | 7                       | vib    | 610.9045  | 0.0 | 1   |                      |
| 814 | 8                       | vib    | 989.9251  | 0.0 | 1   |                      |
| 815 | 9                       | vib    | 1184.8010 | 0.0 | 1   |                      |
| 816 | 10                      | vib    | 1416.6210 | 0.0 | 1   |                      |
| 817 | 11                      | vib    | 1750.6380 | 0.0 | 1   |                      |
| 818 | 12                      | vib    | 2256.1450 | 0.0 | 1   |                      |
| 819 | 13                      | vib    | 3214.7083 | 0.0 | 1   |                      |
| 820 | 14                      | vib    | 3315.1503 | 0.0 | 1   |                      |
| 821 | 15                      | kro    | 57.4764   | 1.0 | 1   | ! K-rotor            |
| 822 | 16                      | jro    | 826.7412  | 1.0 | 2   | ! 2D adiabatic rotor |
| 823 |                         |        |           |     |     |                      |
| 824 | ctst                    | rc-710 | 0.00      | 7.1 | 0.0 |                      |
| 825 | C2H2O3                  |        |           |     |     |                      |
| 826 | a) (blank comment line) |        |           |     |     |                      |
| 827 | b) (blank comment line) |        |           |     |     |                      |
| 828 | c) (blank comment line) |        |           |     |     |                      |
| 829 | 1                       | 1      | 1         |     |     |                      |
| 830 | 0.0                     |        | 1         |     |     |                      |
| 831 | 16                      | 'HAR'  | AMUA      |     |     |                      |
| 832 | 1                       | vib    | -5.6190   | 0.0 | 1   |                      |
| 833 | 2                       | vib    | -1.9075   | 0.0 | 1   |                      |
| 834 | 3                       | vib    | 15.1824   | 0.0 | 1   |                      |

|     |      |                      |           |      |   |                      |
|-----|------|----------------------|-----------|------|---|----------------------|
| 835 | 4    | vib                  | 32.7545   | 0.0  | 1 |                      |
| 836 | 5    | vib                  | 447.0081  | 0.0  | 1 |                      |
| 837 | 6    | vib                  | 576.8513  | 0.0  | 1 |                      |
| 838 | 7    | vib                  | 610.8668  | 0.0  | 1 |                      |
| 839 | 8    | vib                  | 989.9205  | 0.0  | 1 |                      |
| 840 | 9    | vib                  | 1184.7728 | 0.0  | 1 |                      |
| 841 | 10   | vib                  | 1416.5925 | 0.0  | 1 |                      |
| 842 | 11   | vib                  | 1750.3295 | 0.0  | 1 |                      |
| 843 | 12   | vib                  | 2255.8652 | 0.0  | 1 |                      |
| 844 | 13   | vib                  | 3214.7235 | 0.0  | 1 |                      |
| 845 | 14   | vib                  | 3315.1721 | 0.0  | 1 |                      |
| 846 | 15   | kro                  | 57.3636   | 1.0  | 1 | ! K-rotor            |
| 847 | 16   | jro                  | 900.1840  | 1.0  | 2 | ! 2D adiabatic rotor |
| 848 |      |                      |           |      |   |                      |
| 849 | prod | C2H2O-----           | 0.0       | 10.0 |   |                      |
| 850 |      | C2H2O                |           |      |   |                      |
| 851 | a)   | (blank comment line) |           |      |   |                      |
| 852 | b)   | (blank comment line) |           |      |   |                      |
| 853 | c)   | (blank comment line) |           |      |   |                      |
| 854 | 1    | 1                    | 1         |      |   |                      |
| 855 | 0.0  | 1                    |           |      |   |                      |
| 856 | 11   | 'HAR'                | AMUA      |      |   |                      |
| 857 | 1    | vib                  | 445.4186  | 0.0  | 1 |                      |
| 858 | 2    | vib                  | 576.5236  | 0.0  | 1 |                      |
| 859 | 3    | vib                  | 605.5819  | 0.0  | 1 |                      |
| 860 | 4    | vib                  | 989.3038  | 0.0  | 1 |                      |
| 861 | 5    | vib                  | 1184.8513 | 0.0  | 1 |                      |
| 862 | 6    | vib                  | 1415.4176 | 0.0  | 1 |                      |
| 863 | 7    | vib                  | 2256.1163 | 0.0  | 1 |                      |
| 864 | 8    | vib                  | 3217.5075 | 0.0  | 1 |                      |
| 865 | 9    | vib                  | 3318.9177 | 0.0  | 1 |                      |
| 866 | 10   | kro                  | 1.7856    | 1.0  | 1 | ! K-rotor            |
| 867 | 11   | jro                  | 49.4739   | 1.0  | 2 | ! 2D adiabatic rotor |
| 868 |      |                      |           |      |   |                      |
| 869 | prod | O2-----              | 0.0       | 10.0 |   |                      |
| 870 |      | O2                   |           |      |   |                      |
| 871 | a)   | (blank comment line) |           |      |   |                      |
| 872 | b)   | (blank comment line) |           |      |   |                      |
| 873 | c)   | (blank comment line) |           |      |   |                      |
| 874 | 2    | 1                    | 1         |      |   |                      |
| 875 | 0.0  | 3                    |           |      |   |                      |
| 876 | 2    | 'HAR'                | AMUA      |      |   |                      |
| 877 | 1    | vib                  | 1681.6328 | 0.0  | 1 |                      |
| 878 | 2    | jro                  | 11.6367   | 1.0  | 2 | ! 2D adiabatic rotor |

Listing 2: Mesmer input file for  $\text{H}_2\text{C}_2\text{O} + {}^1\text{O}_2$

```

1 <?xml version="1.0" encoding="utf-8" ?>
2 <?xml-stylesheet type='text/xsl' href='../.. / mesmer2.xsl' media='other' ?>
3 <?xml-stylesheet type='text/xsl' href='../.. / mesmer1.xsl' media='screen' ?>
4 <me:mesmer xmlns="http://www.xml-cml.org/schema" xmlns:me="http://www.chem.leeds.ac.
    uk/mesmer"
5 xmlns:xsi="http://www.w3.org/2001/XMLSchema-instance" xmlns:cml="http://www.xml-cml.
    org/schema">
6 <me:title>MESMER Title</me:title>
7 <moleculeList>
8     <molecule id="N2">
9         <atom elementType="He" />
10        <propertyList>
11            <property dictRef="me:epsilon">
12                <scalar>84.942</scalar>
13            </property>
14            <property dictRef="me:sigma">
15                <scalar>3.707</scalar>
16            </property>
17            <property dictRef="me:MW">
18                <scalar units="amu">28.0</scalar>
19            </property>
20        </propertyList>
21    </molecule>
22    <molecule id="RC">
23        <atomArray>
24            <atom id="a1" elementType="C" x3="-0.60034802558431" y3="0.97348784453155" z3="
                0.00023471289493" />
25            <atom id="a2" elementType="H" x3="-0.72782358392821" y3="1.56764279154758" z3="
                -0.90348943439161" />
26            <atom id="a3" elementType="H" x3="-0.72771479140250" y3="1.56719225104095" z3="
                0.90427236466860" />
27            <atom id="a4" elementType="C" x3="0.60241372768466" y3="0.06269057786815" z3="
                -0.00008596640423" />
28            <atom id="a5" elementType="O" x3="1.78508498488250" y3="0.10865564519820" z3="
                -0.00005074471132" />
29            <atom id="a6" elementType="O" x3="-0.19186338529144" y3="-1.06487091305615" z3="
                -0.00015255573541" />
30            <atom id="a7" elementType="O" x3="-1.42504292636070" y3="-0.21225719713027" z3="
                -0.00000637632096" />
31        </atomArray>
32        <bondArray>
33            <bond atomRefs2="a1 a2" order="1" />
34            <bond atomRefs2="a1 a3" order="1" />

```

```

35 <bond atomRefs2="a1 a4" order="1"/>
36 <bond atomRefs2="a1 a7" order="1"/>
37 <bond atomRefs2="a4 a5" order="1"/>
38 <bond atomRefs2="a4 a6" order="1"/>
39 <bond atomRefs2="a6 a7" order="1"/>
40 </bondArray>
41 <propertyList>
42 <property dictRef="me:ZPE">
43 <scalar units="kcal/mol">81.61</scalar>
44 </property>
45 <property dictRef="me:rotConsts">
46 <array units="cm-1">0.457411 0.176446 0.130578</array>
47 </property>
48 <property dictRef="me:vibFreqs">
49 <array units="cm-1">221.94 484.45 506.35 736.63 819.74 917.58
1020.89 1024.71 1146.46 1153.96 1309.59 1487.84 1941.44 3085.68
3155.69</array>
50 </property>
51 <property dictRef="me:frequenciesScaleFactor">
52 <scalar>1</scalar>
53 </property>
54 <property dictRef="me:symmetryNumber">
55 <scalar>1</scalar>
56 </property>
57 <property dictRef="me:MW">
58 <scalar units="amu">74.03</scalar>
59 </property>
60 <property dictRef="me:spinMultiplicity">
61 <scalar>1</scalar>
62 </property>
63 <property dictRef="me:epsilon">
64 <scalar>483.3418</scalar>
65 </property>
66 <property dictRef="me:sigma">
67 <scalar>4.86</scalar>
68 </property>
69 </propertyList>
70 <me:DOSCMETHOD name="ClassicalRotors"/>
71 <me:energyTransferModel xsi:type="me:ExponentialDown">
72 <me:deltaEDown units="cm-1">200</me:deltaEDown>
73 </me:energyTransferModel>
74 </molecule>
75 <molecule id="TS">
76 <atomArray>

```

```

77 <atom id="a1" elementType="C" x3="-0.74382807048935" y3="-0.86769855577965" z3="
    0.00030915393257" />
78 <atom id="a2" elementType="H" x3="-0.80888447000204" y3="-1.46584325280376" z3="
    0.91224544057895" />
79 <atom id="a3" elementType="H" x3="-0.80557363308962" y3="-1.47527338567108" z3="
    -0.90531778806521" />
80 <atom id="a4" elementType="C" x3="0.53764461267181" y3="-0.01917841264472" z3="
    -0.00083545242294" />
81 <atom id="a5" elementType="O" x3="1.68687203946410" y3="-0.40804360242030" z3="
    -0.01220068672746" />
82 <atom id="a6" elementType="O" x3="0.26481183030661" y3="1.23655925641933" z3="
    0.01132945211404" />
83 <atom id="a7" elementType="O" x3="-1.63066630886152" y3="0.20676195290019" z3="
    -0.00554911940995" />
84 </atomArray>
85 <bondArray>
86 <bond atomRefs2="a1 a2" order="1" />
87 <bond atomRefs2="a1 a3" order="1" />
88 <bond atomRefs2="a1 a4" order="1" />
89 <bond atomRefs2="a1 a7" order="1" />
90 <bond atomRefs2="a4 a5" order="1" />
91 <bond atomRefs2="a4 a6" order="1" />
92 </bondArray>
93 <propertyList>
94 <property dictRef="me:ZPE">
95 <scalar units="kcal/mol">100.14</scalar>
96 </property>
97 <property dictRef="me:rotConsts">
98 <array units="cm-1">0.394355 0.164789 0.118958</array>
99 </property>
100 <property dictRef="me:vibFreqs">
101 <array units="cm-1">195.12 450.77 539.34 591.33 729.55 934.62 962.34
    1040.82 1200.81 1285.45 1491.24 1633.05 3015.12 3126.98</array>
102 </property>
103 <property title="ImaginaryFrequency" dictRef="me:imFreqs">
104 <scalar units="cm-1">742.40</scalar>
105 </property>
106 <property dictRef="me:frequenciesScaleFactor">
107 <scalar>1</scalar>
108 </property>
109 <property dictRef="me:symmetryNumber">
110 <scalar>1</scalar>
111 </property>
112 <property dictRef="me:spinMultiplicity">

```

```

113         <scalar>1</scalar>
114     </property>
115 </propertyList>
116 <me:DOSCMMethod name=" ClassicalRotors" />
117 </molecule>
118 <molecule id="PC">
119 <atomArray>
120 <atom id="a1" elementType="C" x3="-2.13323954674242" y3="0.16928547286276" z3="
0.00000083609036" />
121 <atom id="a2" elementType="H" x3="-1.77687215610886" y3="1.21156732452937" z3="
0.00011203508798" />
122 <atom id="a3" elementType="H" x3="-3.22353150671445" y3="0.01112607807650" z3="
0.00002551509760" />
123 <atom id="a4" elementType="C" x3="1.31695680811755" y3="0.16719323513296" z3="
-0.00000885402164" />
124 <atom id="a5" elementType="O" x3="1.78988573703196" y3="-0.89273765587214" z3="
0.00007344080807" />
125 <atom id="a6" elementType="O" x3="0.87557297647335" y3="1.24508950048442" z3="
0.00000293873488" />
126 <atom id="a7" elementType="O" x3="-1.36168231205714" y3="-0.76087095521387" z3="
-0.00013891179724" />
127 </atomArray>
128 <bondArray>
129 <bond atomRefs2="a1 a2" order="1" />
130 <bond atomRefs2="a1 a3" order="1" />
131 <bond atomRefs2="a1 a7" order="1" />
132 <bond atomRefs2="a4 a5" order="1" />
133 <bond atomRefs2="a4 a6" order="1" />
134 </bondArray>
135 <propertyList>
136 <property dictRef="me:ZPE">
137 <scalar units="kcal/mol">0.0</scalar>
138 </property>
139 <property dictRef="me:rotConsts">
140 <array units="cm-1">0.345509 0.092621 0.073041</array>
141 </property>
142 <property dictRef="me:vibFreqs">
143 <array units="cm-1">41.58 85.71 106.49 149.79 159.13 662.65 678.73
1195.10 1275.73 1352.07 1534.26 1772.59 2392.32 2942.87 3022.18<
/ array>
144 </property>
145 <property dictRef="me:frequenciesScaleFactor">
146 <scalar>1</scalar>
147 </property>

```



```

148         <property dictRef="me:symmetryNumber">
149             <scalar>1</scalar>
150         </property>
151         <property dictRef="me:MW">
152             <scalar units="amu">74.03</scalar>
153         </property>
154     </propertyList>
155     <me:DOSCMMethod name="ClassicalRotors"/>
156 </molecule>
157 <molecule id="Ketene">
158     <atomArray>
159     <atom id="a1" elementType="C" x3="0.00021770427021" y3="-1.21382351018876" z3="
160         -0.00000000292172"/>
161     <atom id="a2" elementType="H" x3="-0.94196912661695" y3="-1.73673477024717" z3="
162         0.00000000136923"/>
163     <atom id="a3" elementType="H" x3="0.94259142801765" y3="-1.73639906167143" z3="
164         0.00000000136929"/>
165     <atom id="a4" elementType="C" x3="-0.00001555038755" y3="0.10262415088185" z3="
166         -0.00000000083898"/>
167     <atom id="a5" elementType="O" x3="-0.00022745528336" y3="1.26544619122551" z3="
168         0.00000000102218"/>
169     </atomArray>
170     <bondArray>
171     <bond atomRefs2="a1 a2" order="1"/>
172     <bond atomRefs2="a1 a3" order="1"/>
173     <bond atomRefs2="a1 a4" order="1"/>
174     <bond atomRefs2="a4 a5" order="1"/>
175     </bondArray>
176     <propertyList>
177     <property dictRef="me:ZPE">
178         <scalar units="kcal/mol">133.75</scalar>
179     </property>
180     <property dictRef="me:rotConsts">
181         <array units="cm-1">9.417728 0.342301 0.330296</array>
182     </property>
183     <property dictRef="me:vibFreqs">
184         <array units="cm-1">433.64 511.61 584.74 993.20 1153.78 1415.68
185             2195.26 3196.02 3305.43</array>
186     </property>
187     <property dictRef="me:frequenciesScaleFactor">
188         <scalar>1</scalar>
189     </property>
190     <property dictRef="me:symmetryNumber">
191         <scalar>1</scalar>

```

```

186         </property>
187         <property dictRef="me:spinMultiplicity">
188             <scalar>1</scalar>
189         </property>
190     </propertyList>
191     <me:DOSCMMethod name="ClassicalRotors" />
192 </molecule>
193 <molecule id="O2">
194     <atomArray>
195     <atom id="a1" elementType="C" x3="0.00000000000000" y3="0.00000000000000" z3="
196         0.60991780529370" />
197     <atom id="a2" elementType="H" x3="0.00000000000000" y3="0.00000000000000" z3="
198         -0.60991780529370" />
199 </atomArray>
200 <bondArray>
201     <bond atomRefs2="a1 a2" order="1" />
202 </bondArray>
203     <propertyList>
204         <property dictRef="me:ZPE">
205             <scalar units="kcal/mol">0.0</scalar>
206         </property>
207         <property dictRef="me:rotConsts">
208             <array units="cm-1">0.000000 1.416222 1.416222</array>
209         </property>
210         <property dictRef="me:vibFreqs">
211             <array units="cm-1">1501.35</array>
212         </property>
213         <property dictRef="me:frequenciesScaleFactor">
214             <scalar>1</scalar>
215         </property>
216         <property dictRef="me:symmetryNumber">
217             <scalar>2</scalar>
218         </property>
219         <property dictRef="me:spinMultiplicity">
220             <scalar>1</scalar>
221         </property>
222     </propertyList>
223     <me:DOSCMMethod name="ClassicalRotors" />
224 </molecule>
225 </moleculeList>
226 <reactionList>
227     <reaction id="R0">
228         <reactant>
229             <molecule ref="Ketene" me:type="deficientReactant" />

```

```

228     </reactant>
229     <reactant>
230         <molecule ref="O2" me:type="excessReactant" />
231     </reactant>
232     <product>
233         <molecule ref="RC" me:type="modelled" />
234     </product>
235     <me:MCRCMethod name="MesmerILT" />
236     <me:preExponential units="cm3molecule-1s-1">4.96E-15</me:preExponential>
237     <me:activationEnergy units="kJ/mol">0.0</me:activationEnergy>
238     <me:TInfinity>298.0</me:TInfinity>
239     <me:nInfinity>0.0</me:nInfinity>
240     <me:excessReactantConc>1.7E8</me:excessReactantConc>
241 </reaction>
242 <reaction id="R1">
243     <reactant>
244         <molecule ref="RC" me:type="modelled" />
245     </reactant>
246     <product>
247         <molecule ref="PC" me:type="sink" />
248     </product>
249     <me:MCRCMethod name="RRKM" />
250     <me:transitionState>
251         <molecule ref="TS" me:type="transitionState" />
252     </me:transitionState>
253     <me:tunneling>Eckart</me:tunneling>
254 </reaction>
255 </reactionList>
256 <me:conditions>
257     <me:bathGas>N2</me:bathGas>
258     <me:PTs>
259         <!--<me:PTset units="PPCC">-->
260         <!--<me:Prange initial="2.42E18" final="2.82E18" increment="0.40E18"/>-->
261         <!--<me:Trange initial="200" final="350" increment="10"/>-->
262         <!--</me:PTset>-->
263         <!--me:PTpair units="atm" P="1.00" T="298." />-->
264         <me:PTpair units="atm" P="1.0" T="200." precision="qd"/>
265         <me:PTpair units="atm" P="1.0" T="210." precision="qd"/>
266         <me:PTpair units="atm" P="1.0" T="220." precision="qd"/>
267         <me:PTpair units="atm" P="1.0" T="230." precision="qd"/>
268         <me:PTpair units="atm" P="1.0" T="240." precision="qd"/>
269         <me:PTpair units="atm" P="1.0" T="250." precision="qd"/>
270         <me:PTpair units="atm" P="1.0" T="260." precision="qd"/>
271         <me:PTpair units="atm" P="1.0" T="270." precision="qd"/>

```

```

272     <me:PTpair units="atm" P="1.0" T="280." precision ="qd" />
273     <me:PTpair units="atm" P="1.0" T="290." precision ="qd" />
274     <me:PTpair units="atm" P="1.0" T="298." precision ="qd" />
275     <me:PTpair units="atm" P="1.0" T="300." precision ="qd" />
276     <me:PTpair units="atm" P="1.0" T="310." precision ="qd" />
277     <me:PTpair units="atm" P="1.0" T="320." precision ="qd" />
278     <me:PTpair units="atm" P="1.0" T="330." precision ="qd" />
279 </me:PTs>
280 </me:conditions>
281 <me:modelParameters>
282     <me:grainSize units="cm-1">100</me:grainSize>
283     <me:energyAboveTheTopHill>25.0</me:energyAboveTheTopHill>
284 </me:modelParameters>
285 <me:control>
286     <me:eigenvalues>0</me:eigenvalues>
287     <me:calcMethod>simpleCalc</me:calcMethod>
288     <me:printReactionOperatorColumnSums/>
289     <me:printGrainBoltzmann/>
290     <me:testMicroRates/>
291     <me:testRateConstants/>
292     <me:printGrainDOS/>
293     <me:printGrainkbE/>
294     <me:printGrainkfE/>
295     <me:printTunnellingCoefficients/>
296     <me:testDOS/>
297     <me:printCellDOS/>
298     <me:printSpeciesProfile/>
299 </me:control>
300 </me:mesmer>

```
